# Supplementary material for: An organic–inorganic hybrid semiconductor for flexible thin film transistors using molecular layer deposition
Source: Royal Society of Chemistry journal article supplement (doi:10.1039/d0tc05281g), 2021-01-01
Supplement: d0tc05281g1.pdf [file d0tc05281g1.pdf]

## Supporting Information

# An Organic-Inorganic Hybrid Semiconductor for Flexible Thin Film Transistor using Molecular Layer Deposition

Seunghwan Lee<sup>1‡</sup>, Hyun-Jun Jeong<sup>1‡</sup>, Ki-Lim Han<sup>1</sup>, GeonHo Beak<sup>2</sup>, and Jin-Seong Park<sup>1,2,\*</sup>

1Division of Materials Science and Engineering, Hanyang University, Seoul, Korea

2Division of Nanoscale Semiconductor Engineering, Hanyang University, Seoul, Korea

‡These authors contributed equally to this work. (Seunghwan Lee ([sevenfoku@hanyang.ac.kr](mailto:sevenfoku@hanyang.ac.kr)) and Hyun-Jun Jeong ([msehyunjun@hanyang.ac.kr](mailto:msehyunjun@hanyang.ac.kr)))

\*Corresponding Author: [jsparklime@hanyang.ac.kr](mailto:jsparklime@hanyang.ac.kr)

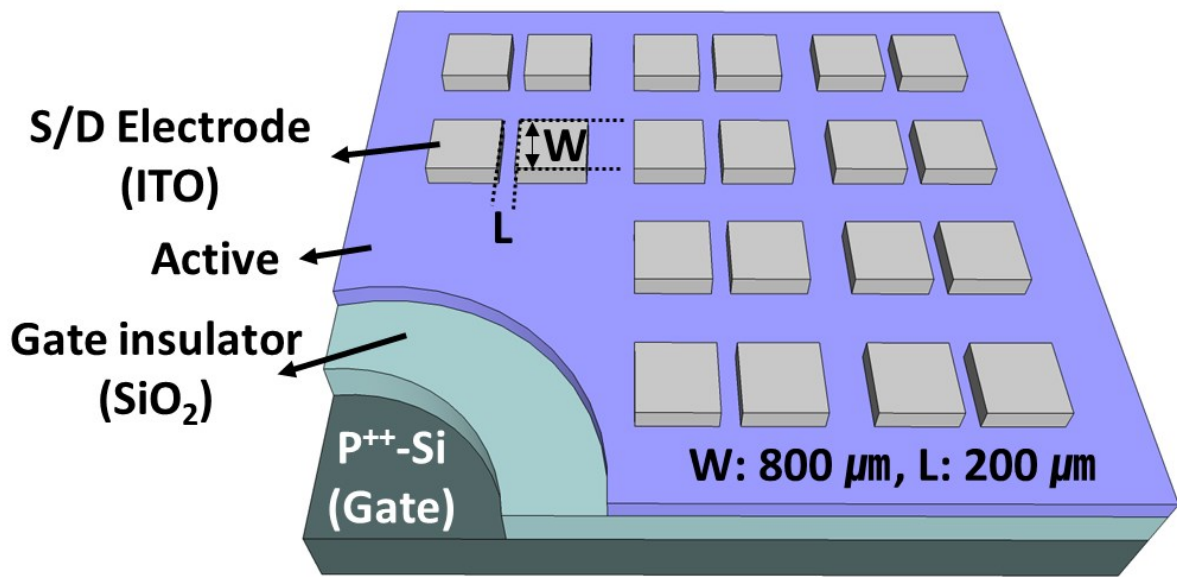

**Figure S1.** Schematics of thin film transistors (TFTs) via fine-metal mask (FMM). Thermal silicon dioxide (SiO<sub>2</sub>, 100 nm) was used as gate insulator and ITO S/D electrode (100 nm) was deposited using reactive sputter. Device width (W) and length (L) are 800 and 200 μm, respectively. indium oxide, 99:1 and 49:1 hybrid films are used as active layer.

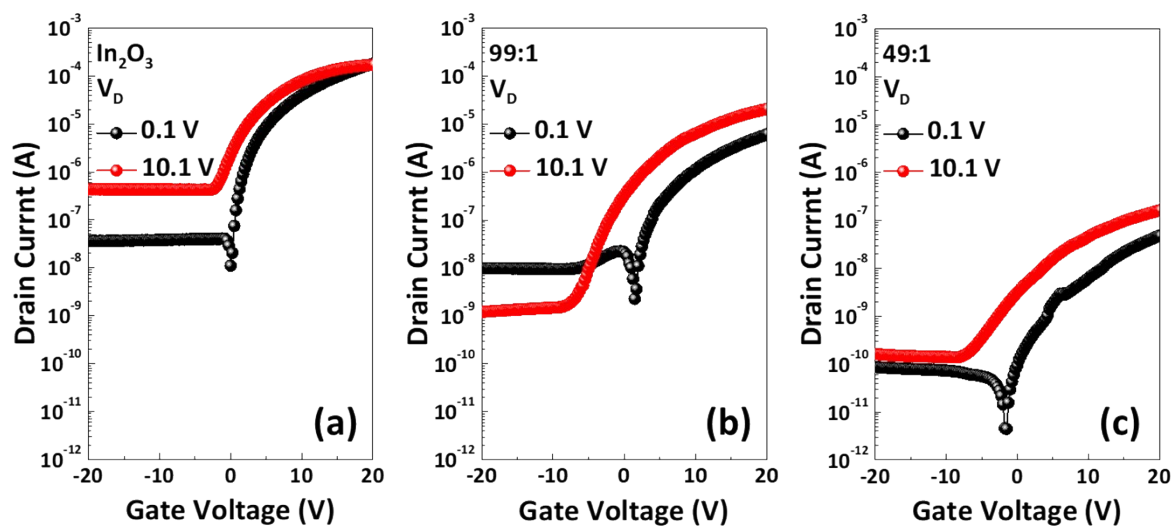

**Figure S2.** Transfer characteristics of (a)  $\text{In}_2\text{O}_3$ , (b) 99:1 indicone and (c) 49:1 indicone. Off current of each devices is relatively high compare to figure 5. This phenomenon is caused by the un-patterned gate electrode, insulator and active. As indicone layer increased, the device parameters are decreased.

**Table S1.** The device parameters of  $\text{In}_2\text{O}_3$ , 99:1 indicone, and 49:1 indicone

| <b>Sample</b>                                                            | <b><math>\text{In}_2\text{O}_3</math></b> | <b>99:1<br/>(<math>\text{In}_2\text{O}_3</math>:Indicone)</b> | <b>49:1<br/>(<math>\text{In}_2\text{O}_3</math>:Indicone)</b> |
|--------------------------------------------------------------------------|-------------------------------------------|---------------------------------------------------------------|---------------------------------------------------------------|
| <b><math>V_{\text{th}}</math> (V)</b>                                    | -1.47                                     | -0.52                                                         | 7.71                                                          |
| <b>SS (V/decade)</b>                                                     | 2.73                                      | 2.23                                                          | 4.95                                                          |
| <b><math>\mu_{\text{FE}}</math> (<math>\text{cm}^2/\text{Vs}</math>)</b> | 9.30                                      | 0.82                                                          | 0.01                                                          |
